# Supplementary material for: Constructing a DNA barcode reference library for southern herbs in China: A resource for authentication of southern Chinese medicine
Source: PubMed Central journal article supplement (PMC6059470; doi:10.1371/journal.pone.0201240), 2018-07-25

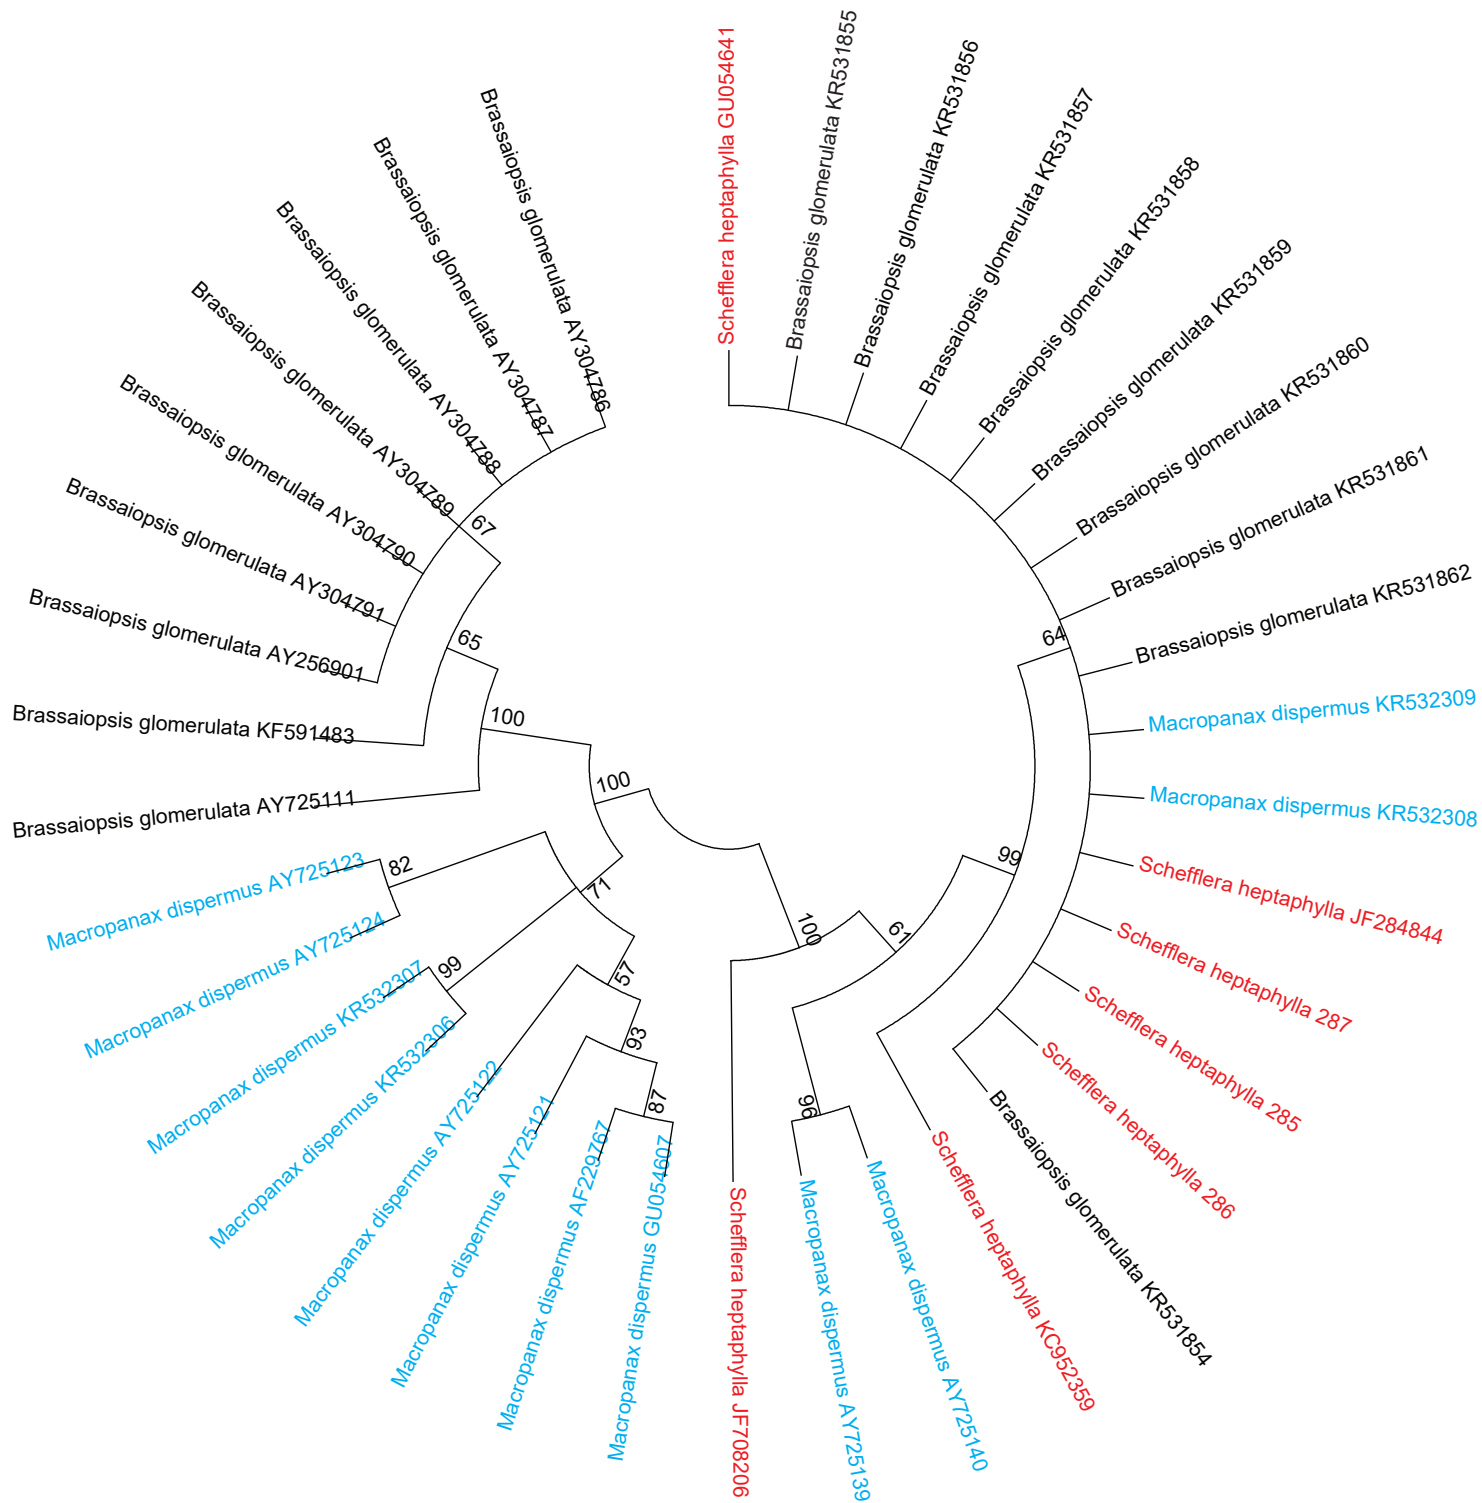

Supplement: pone.0201240.s002.pdf [file pone.0201240.s002.pdf]
