# Supplementary material for: Constructing a DNA barcode reference library for southern herbs in China: A resource for authentication of southern Chinese medicine
Source: PubMed Central journal article supplement (PMC6059470; doi:10.1371/journal.pone.0201240), 2018-07-25
Supplement: pone.0201240.s003.pdf [file pone.0201240.s003.pdf]

10 20 30 40 50 60 70 80  
Ageratum conyzoides\_522 CGCATCACGTCGCCCGGTACACATCCTTCTTGGATTGTGTTGTACGTGGCGGATACCTGGTCTTCCGTGCCCATGGT  
Ageratum conyzoides\_523  
Ageratum conyzoides\_524  
Ageratum conyzoides\_1424  
Ageratum conyzoides\_1425  
Praxelis clematidea\_KP454557.1  
Praxelis clematidea\_KR425593.1  
Praxelis clematidea\_KR425594.1  
Praxelis clematidea\_KR425596.1  
Praxelis clematidea\_KR425598.1  
Praxelis clematidea\_KR425600.1  
Praxelis lematidea\_KC012535.1  
Praxelis clematidea\_KC012531.1  
Praxelis clematidea\_KC012528.1  
Praxelis clematidea\_KC012527.1  
Praxelis clematidea\_KC012522.1  
Praxelis clematidea\_KC012563.1  
Praxelis clematidea\_KR425604.1  
Praxelis clematidea\_KR425603.1  
Praxelis clematidea\_KR425601.1  
Praxelis clematidea\_KC012556.1  
Praxelis clematidea\_KC012554.1  
Praxelis clematidea\_KC012552.1  
Praxelis clematidea\_KC012549.1  
Praxelis clematidea\_KC012547.1  
Praxelis clematidea\_KC012546.1  
Praxelis clematidea\_KC012543.1  
Praxelis clematidea\_KC012539.1  
Praxelis clematidea\_KC012537.1  
Praxelis clematidea\_JX996076.1  
Praxelis clematidea\_JX996074.1  
Praxelis clematidea\_JX996072.1  
Praxelis clematidea\_KC107787.1  
Praxelis clematidea\_KC012570.1  
Praxelis clematidea\_KC012566.1  
Praxelis clematidea\_KC012562.1  
Praxelis clematidea\_KC012558.1

90 100 110 120 130 140 150 160  
Ageratum conyzoides\_522 GTGGTTGGCCAAACAGGAGTCCGCTAAAGAAAGAGGCACGACTGGTGGTGGTTTGATTTACAGTCTCTCGGGCGTG  
Ageratum conyzoides\_523  
Ageratum conyzoides\_524  
Ageratum conyzoides\_1424  
Ageratum conyzoides\_1425  
Praxelis clematidea\_KP454557.1  
Praxelis clematidea\_KR425593.1  
Praxelis clematidea\_KR425594.1  
Praxelis clematidea\_KR425596.1  
Praxelis clematidea\_KR425598.1  
Praxelis clematidea\_KR425600.1  
Praxelis lematidea\_KC012535.1  
Praxelis clematidea\_KC012531.1  
Praxelis clematidea\_KC012528.1  
Praxelis clematidea\_KC012527.1  
Praxelis clematidea\_KC012522.1  
Praxelis clematidea\_KC012563.1  
Praxelis clematidea\_KR425604.1  
Praxelis clematidea\_KR425603.1  
Praxelis clematidea\_KR425601.1  
Praxelis clematidea\_KC012556.1  
Praxelis clematidea\_KC012554.1  
Praxelis clematidea\_KC012552.1  
Praxelis clematidea\_KC012549.1  
Praxelis clematidea\_KC012547.1  
Praxelis clematidea\_KC012546.1  
Praxelis clematidea\_KC012543.1  
Praxelis clematidea\_KC012539.1  
Praxelis clematidea\_KC012537.1  
Praxelis clematidea\_JX996076.1  
Praxelis clematidea\_JX996074.1  
Praxelis clematidea\_JX996072.1  
Praxelis clematidea\_KC107787.1  
Praxelis clematidea\_KC012570.1  
Praxelis clematidea\_KC012566.1  
Praxelis clematidea\_KC012562.1  
Praxelis clematidea\_KC012558.1

170 180 190 200 210 220 230  
Ageratum conyzoides\_522 TGCTCTGACTCTTAAAGCGAAATGACTTGAAGTACCATGATGTGTTGTTCTTGTAAACGGCCTTTCCGATCG  
Ageratum conyzoides\_523  
Ageratum conyzoides\_524  
Ageratum conyzoides\_1424  
Ageratum conyzoides\_1425  
Praxelis clematidea\_KP454557.1  
Praxelis clematidea\_KR425593.1  
Praxelis clematidea\_KR425594.1  
Praxelis clematidea\_KR425596.1  
Praxelis clematidea\_KR425598.1  
Praxelis clematidea\_KR425600.1  
Praxelis lematidea\_KC012535.1  
Praxelis clematidea\_KC012531.1  
Praxelis clematidea\_KC012528.1  
Praxelis clematidea\_KC012527.1  
Praxelis clematidea\_KC012522.1  
Praxelis clematidea\_KC012563.1  
Praxelis clematidea\_KR425604.1  
Praxelis clematidea\_KR425603.1  
Praxelis clematidea\_KR425601.1  
Praxelis clematidea\_KC012556.1  
Praxelis clematidea\_KC012554.1  
Praxelis clematidea\_KC012552.1  
Praxelis clematidea\_KC012549.1  
Praxelis clematidea\_KC012547.1  
Praxelis clematidea\_KC012546.1  
Praxelis clematidea\_KC012543.1  
Praxelis clematidea\_KC012539.1  
Praxelis clematidea\_KC012537.1  
Praxelis clematidea\_JX996076.1  
Praxelis clematidea\_JX996074.1  
Praxelis clematidea\_JX996072.1  
Praxelis clematidea\_KC107787.1  
Praxelis clematidea\_KC012570.1  
Praxelis clematidea\_KC012566.1  
Praxelis clematidea\_KC012562.1  
Praxelis clematidea\_KC012558.1
